# Supplementary material for: Bio-C (Modified Hyaluronic Acid-Coated-Collagen Tube) Implants Enable Functional Recovery after Complete Spinal Cord Injury
Source: Pharmaceutics. 2022 Mar 9;14(3):596. doi: 10.3390/pharmaceutics14030596 (PMC8954105; doi:10.3390/pharmaceutics14030596)
Supplement: Supplementary file 1 [file pharmaceutics-14-00596-s001.zip]

Archive with 7 entries (7 files):
- Supplementary figure S1.pdf
- Supplementary figure S2.pdf
- Supplementary figure S3.pdf
- Supplementary figure S4.pdf
- Supplementary Video 1.mp4
- Supplementary Video 2.avi
- supplimentary Legend_final.pdf
